# Supplementary material
Source: Springer Nature journal article supplement (https://www.springermedizin.de/resource/supplementary/12889_2012_4869_MOESM2_ESM.pdf/9494548)

### Diabetes mellitus

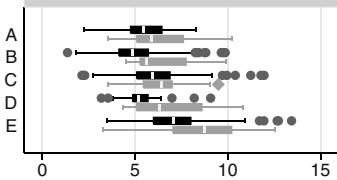

### Diabetes mellitus

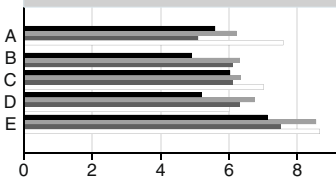

### Treated diabetes

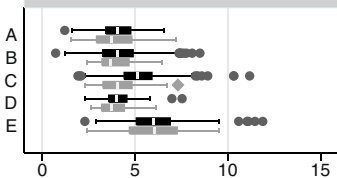

### Treated diabetes

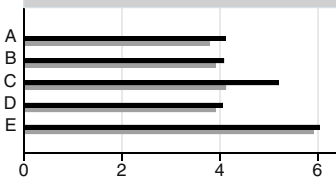

### Ischaemic heart disease

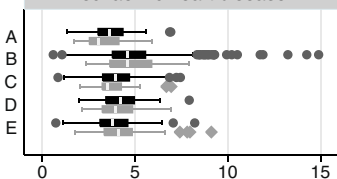

### Ischaemic heart disease

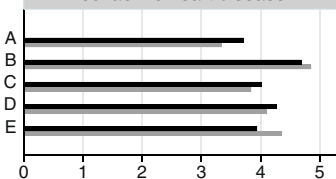

### Heart failure

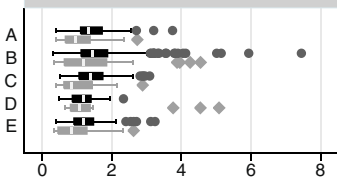

### Heart failure

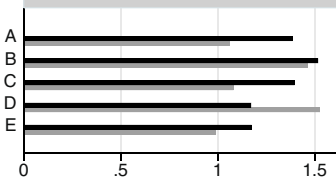

### COPD

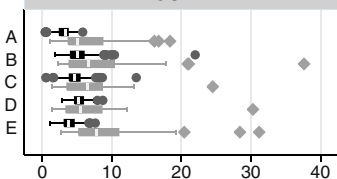

### COPD

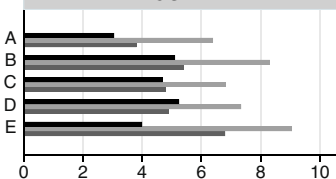

Prevalence distribution

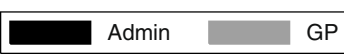

Prevalence estimate

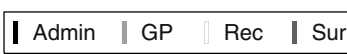

Supplement: MOESM2 [file 9494548]
